# Supplementary material for: Occurrence and functional significance of the transcriptome in bovine (Bos taurus) spermatozoa
Source: PubMed Central journal article supplement (PMC5343582; doi:10.1038/srep42392), 2017-03-09
Supplement: srep42392-s1.pdf [file srep42392-s1.pdf]

## Supplementary information

### Occurrence and functional significance of the transcriptome in bovine (*Bos taurus*) spermatozoa

Sellappan Selvaraju<sup>1,\*</sup>, Sivashanmugam Parthipan<sup>1,#</sup>, Lakshminarayana Somashekar<sup>1,#</sup>, Atul P Kolte<sup>2</sup>, Binsila B Krishnan<sup>1</sup>, Arunachalam Arangasamy<sup>1</sup> and Janivara Parameshwaraiah Ravindra<sup>1</sup>

<sup>1</sup>Reproductive Physiology laboratory, Animal Physiology Division, <sup>2</sup>Omics laboratory, Animal Nutrition Division, ICAR-National Institute of Animal Nutrition and Physiology, Adugodi, Bengaluru-560030

<sup>#</sup>Department of Biochemistry, Jain University, Bengaluru-560001

**Supplemental Table S1: The RNA integrity of top 100 abundant spermatozoal transcripts. The transcripts integrity was analyzed manually by visualizing the read coverage.**

| Gene ID           | TPM  | UGR  | Intact* | 5' coverage | 3' coverage |
|-------------------|------|------|---------|-------------|-------------|
| <i>PRM1</i>       | 8659 | 120  | Yes     | Yes         | Yes         |
| <i>YWHAZ</i>      | 3050 | 84   | Yes     | Yes         | Yes         |
| <i>SCP2D1</i>     | 2726 | 182  | Yes     | Yes         | Yes         |
| <i>CHMP5</i>      | 1693 | 260  | Yes     | No          | Yes         |
| <i>MGC137055</i>  | 1434 | 74   | Yes     | No          | Yes         |
| <i>GTSF1L</i>     | 1416 | 155  | Yes     | No          | Yes         |
| <i>PAG5</i>       | 971  | 962  | Yes     | No          | Yes         |
| <i>CCDC181</i>    | 919  | 144  | Yes     | Yes         | Yes         |
| <i>TNP1</i>       | 875  | 308  | Yes     | Yes         | Yes         |
| <i>CCDC85A</i>    | 829  | 3481 | Yes     | No          | Yes         |
| <i>C23H6orf62</i> | 788  | 207  | Yes     | Yes         | Yes         |
| <i>BCL2L11</i>    | 783  | 74   | Yes     | Yes         | Yes         |
| <i>CCDC168</i>    | 635  | 179  | Yes     | Yes         | Yes         |
| <i>SSRP1</i>      | 615  | 219  | Yes     | No          | Yes         |
| <i>FAM209B</i>    | 612  | 77   | Yes     | Yes         | Yes         |
| <i>CAPZA3</i>     | 558  | 183  | Yes     | Yes         | Yes         |
| <i>NEK3</i>       | 493  | 636  | Yes     | Yes         | No          |
| <i>RAD21</i>      | 474  | 242  | Yes     | Yes         | Yes         |
| <i>SP2</i>        | 461  | 390  | Yes     | No          | No          |
| <i>SF3B1</i>      | 456  | 361  | Yes     | Yes         | Yes         |
| <i>TMED6</i>      | 455  | 10   | Yes     | Yes         | Yes         |
| <i>PPWD1</i>      | 445  | 37   | Yes     | Yes         | Yes         |
| <i>PAG10</i>      | 440  | 416  | Yes     | No          | No          |
| <i>INVS</i>       | 439  | 2384 | Yes     | No          | No          |
| <i>RPL23</i>      | 424  | 22   | Yes     | No          | Yes         |
| <i>KIAA1731</i>   | 422  | 126  | Yes     | Yes         | Yes         |
| <i>ODZ3</i>       | 419  | 5074 | Yes     | No          | No          |
| <i>RPL27A</i>     | 407  | 536  | Yes     | No          | Yes         |
| <i>LRRD1</i>      | 407  | 27   | Yes     | Yes         | Yes         |
| <i>RPS18</i>      | 403  | 60   | Yes     | Yes         | Yes         |
| <i>SFXN3</i>      | 403  | 557  | Yes     | No          | No          |
| <i>IFN-TAU</i>    | 389  | 118  | Yes     | Yes         | Yes         |

---

|                 |      |      |     |     |     |
|-----------------|------|------|-----|-----|-----|
| <i>IGF1R</i>    | 384  | 5979 | Yes | No  | Yes |
| <i>SH3GL2</i>   | 375  | 2332 | Yes | No  | No  |
| <i>PAG7</i>     | 375  | 119  | Yes | Yes | Yes |
| <i>VPS4A</i>    | 368  | 472  | Yes | No  | Yes |
| <i>FABP1</i>    | 2923 | 1074 | No  | Yes | No  |
| <i>THSD4</i>    | 1961 | 2506 | No  | No  | No  |
| <i>NR2E3</i>    | 1610 | 1241 | No  | No  | No  |
| <i>SV2C</i>     | 1518 | 2592 | No  | No  | No  |
| <i>TOE1</i>     | 1359 | 1743 | No  | No  | Yes |
| <i>SLC16A7</i>  | 1284 | 2831 | No  | No  | No  |
| <i>MCOLN2</i>   | 1231 | 1756 | No  | No  | No  |
| <i>UNC119</i>   | 1136 | 790  | No  | Yes | No  |
| <i>CXCR4</i>    | 1095 | 975  | No  | No  | Yes |
| <i>MMP2</i>     | 933  | 1417 | No  | No  | Yes |
| <i>ITPA</i>     | 919  | 458  | No  | Yes | No  |
| <i>DNAJB12</i>  | 914  | 2315 | No  | No  | No  |
| <i>GPS2</i>     | 907  | 229  | No  | No  | No  |
| <i>BPIFA2A</i>  | 900  | 833  | No  | No  | Yes |
| <i>KCNU1</i>    | 896  | 2544 | No  | No  | Yes |
| <i>TRPC3</i>    | 892  | 1303 | No  | Yes | No  |
| <i>ANKRD34C</i> | 867  | 3053 | No  | Yes | Yes |
| <i>ILF2</i>     | 866  | 126  | No  | No  | Yes |
| <i>CYP8B1</i>   | 804  | 529  | No  | Yes | No  |
| <i>ASTE1</i>    | 785  | 1292 | No  | Yes | No  |
| <i>YSK4</i>     | 756  | 1742 | No  | No  | No  |
| <i>PRSS21</i>   | 719  | 37   | No  | Yes | No  |
| <i>RDH5</i>     | 707  | 496  | No  | No  | Yes |
| <i>LSM10</i>    | 649  | 349  | No  | No  | Yes |
| <i>DBC1</i>     | 646  | 3393 | No  | No  | No  |
| <i>SFXN1</i>    | 643  | 1721 | No  | No  | No  |
| <i>PTGER2</i>   | 620  | 860  | No  | No  | Yes |
| <i>GPR89</i>    | 615  | 1048 | No  | Yes | No  |
| <i>VIT</i>      | 606  | 2722 | No  | No  | No  |
| <i>FBXO6</i>    | 586  | 499  | No  | No  | No  |
| <i>B7H6</i>     | 550  | 586  | No  | No  | No  |

---

|                   |     |      |    |     |     |
|-------------------|-----|------|----|-----|-----|
| <i>ADCY8</i>      | 548 | 3841 | No | No  | No  |
| <i>PTPLAD2</i>    | 535 | 885  | No | No  | Yes |
| <i>BRPF3</i>      | 517 | 1527 | No | Yes | No  |
| <i>DHRS7C</i>     | 515 | 406  | No | No  | Yes |
| <i>RPL37</i>      | 493 | 27   | No | No  | No  |
| <i>HTR1A</i>      | 478 | 394  | No | No  | No  |
| <i>MLH1</i>       | 472 | 1919 | No | Yes | No  |
| <i>TMEM125</i>    | 458 | 359  | No | Yes | No  |
| <i>GPR110</i>     | 446 | 1048 | No | No  | No  |
| <i>DHFR</i>       | 438 | 490  | No | Yes | No  |
| <i>RPL36AL</i>    | 434 | 105  | No | No  | Yes |
| <i>TLR5</i>       | 423 | 513  | No | Yes | No  |
| <i>BSPRY</i>      | 421 | 550  | No | No  | Yes |
| <i>BRB</i>        | 418 | 206  | No | No  | Yes |
| <i>EVI2B</i>      | 417 | 440  | No | No  | Yes |
| <i>ZNF648</i>     | 416 | 361  | No | No  | No  |
| <i>NHLRC3</i>     | 413 | 580  | No | No  | Yes |
| <i>APPL2</i>      | 411 | 812  | No | Yes | No  |
| <i>COMMD1</i>     | 406 | 1499 | No | Yes | No  |
| <i>PRR5L</i>      | 401 | 1260 | No | No  | Yes |
| <i>KRT75</i>      | 398 | 714  | No | No  | No  |
| <i>GPA33</i>      | 392 | 960  | No | No  | No  |
| <i>CIH21orf62</i> | 390 | 515  | No | No  | Yes |
| <i>PCDHB11</i>    | 389 | 581  | No | No  | Yes |
| <i>RASL10B</i>    | 386 | 209  | No | No  | Yes |
| <i>CHTF8</i>      | 385 | 677  | No | Yes | No  |
| <i>ATPBD4</i>     | 382 | 950  | No | Yes | No  |
| <i>CABS1</i>      | 378 | 48   | No | No  | No  |
| <i>MAPK1</i>      | 378 | 193  | No | No  | No  |
| <i>VGLL3</i>      | 370 | 664  | No | No  | No  |
| <i>TOMM40L</i>    | 368 | 626  | No | No  | No  |
| <i>CATSPER3</i>   | 367 | 427  | No | No  | No  |
| <i>RPL6</i>       | 363 | 6    | No | No  | No  |

\*The intactness was considered if the reads were spread covering most of the exons

**Supplemental Table S2: The tissue level expression (RNAs and proteins) and the reproductive functions of top 20 abundant transcripts in bovine spermatozoa.**

| Gene ID          | Gene Name                                                                    | Tissue Expression (RNA level)  | Protein Localization                                                                         | Reproductive Functions                                                | References |
|------------------|------------------------------------------------------------------------------|--------------------------------|----------------------------------------------------------------------------------------------|-----------------------------------------------------------------------|------------|
| <i>PRMI</i>      | Protamine 1                                                                  | Testis (enriched) and prostate | Nucleus and chromosome                                                                       | Histone replacement and chromatin remodeling                          | 1          |
| <i>CHMP5</i>     | Charged Multivesicular Body Protein 5                                        | Testis and prostate            | Cytoplasm, Cytoskeleton-Microtubules and Cytoskeleton-Cytokinetic bridge (Seminiferous duct) | Regulation of late endosome function during embryogenesis             | 2          |
| <i>YWHAZ</i>     | Tyrosine 3-Monooxygenase/Tryptophan 5-Monooxygenase Activation Protein, Zeta | Testis and Prostate            | Intracellular (Cells in Seminiferous duct, Leydig cells and Glandular cells)                 | Spermatozoa protein phosphorylation                                   | 3          |
| <i>GTSF1L</i>    | Gametocyte Specific Factor 1-Like                                            | Testis (enriched)              | Intracellular (Cells in Seminiferous duct and Leydig cells)                                  | Retrotransposon suppression of male germ cells during spermatogenesis | 4          |
| <i>SCP2D1</i>    | SCP2 Sterol-Binding Domain Containing 1                                      | Testis (enriched)              | Intra cellular (Cells in Seminiferous duct and Leydig cells)                                 | Positive association with semen quality                               | 5          |
| <i>MGC137055</i> | DET1 And DDB1 Associated 1 (uncharacterized protein)                         | Testis                         | Not available                                                                                | Reported as full length transcript in bovine spermatozoa              | 6          |
| <i>CCDC181</i>   | Coiled-Coil Domain Containing 181                                            | Testis (enriched)              | Nucleoplasm (Seminiferous duct)                                                              | Involved in the microtubular manchette development of spermatozoa.    | 7          |
| <i>FABP1</i>     | Fatty Acid Binding Protein1                                                  | Not available                  | Not available                                                                                | Spermatogenesis                                                       | 8          |

|                |                                                                                        |                                |                                                               |                                             |               |
|----------------|----------------------------------------------------------------------------------------|--------------------------------|---------------------------------------------------------------|---------------------------------------------|---------------|
| <i>THSD4</i>   | Thrombospondin Type 1 Domain Containing 4                                              | Testis and Prostate (enriched) | Cells in Seminiferous duct, Leydig cells and Glandular cells  | Not available                               | Not available |
| <i>NR2E3</i>   | Nuclear Receptor Subfamily 2 Group E Member 3                                          | Testis and Prostate            | Nuclear receptor                                              | mRNA expressed in testis                    | 9             |
| <i>SV2C</i>    | Synaptic Vesicle Glycoprotein 2C                                                       | Testis and Prostate            | Cells in Seminiferous duct, Leydig cells and Glandular cells  | Not available                               | Not available |
| <i>TOE1</i>    | Target of EGR1, Membrane 1 (Nuclear)                                                   | Testis and prostate            | Cells in Seminiferous duct, Leydig cells and Glandular cells  | Not available                               | Not available |
| <i>SLC16A7</i> | Solute Carrier Family 16 Member 7                                                      | Testis and prostate            | Cells in Seminiferous ducts                                   | Involved in sperm metabolism                | 10            |
| <i>MCOLN2</i>  | Mucolipin 2                                                                            | Testis and prostate            | Cells in Seminiferous duct, Leydig cells and Glandular cells  | Expressed in epididymis                     | 11            |
| <i>UNC119</i>  | Unc-119 Lipid Binding Chaperone                                                        | Testis and prostate            | Glandular cells                                               | Not available                               | Not available |
| <i>CXCR4</i>   | C-X-C Motif Chemokine Receptor 4                                                       | Testis and prostate            | Cells in seminiferous ducts and Glandular cells               | Chemokine signaling molecule in spermatozoa | 12            |
| <i>PAG5</i>    | Pregnancy associated glycoprotein 5                                                    | Testis and prostate            | Cells in seminiferous ducts, Leydig cells and Glandular cells | Reported in bovine placenta                 | 13            |
| <i>MMP2</i>    | Matrix Metalloproteinase 2 (Gelatinase A, 72Kda Gelatinase, 72kDa type IV Collagenase) | Testis and prostate            | Leydig cells and Glandular cells                              | Penetration of zona pellucida               | 14            |
| <i>ITPA</i>    | Inosine                                                                                | Testis and                     | Cells in                                                      | mRNA                                        | 15            |

|                |                                                                   |                        |                                                               |                                    |    |
|----------------|-------------------------------------------------------------------|------------------------|---------------------------------------------------------------|------------------------------------|----|
|                | Triphosphatase<br>(Nucleoside<br>Triphosphate<br>Pyrophosphatase) | prostate               | seminiferous<br>ducts, Leydig<br>cells and<br>Glandular cells | expression was<br>high in testis.  |    |
| <i>DNAJB12</i> | DnaJ Heat Shock<br>Protein Family<br>(Hsp40) Member<br>B12        | Testis and<br>prostate | Cells in<br>seminiferous<br>ducts and<br>Glandular cells      | Chaperone<br>(Similar to<br>HSP40) | 16 |

Note: The above information's are obtained from [www.ncbi.nlm.nih.gov/pubmed](http://www.ncbi.nlm.nih.gov/pubmed), [www.gpubmed.org](http://www.gpubmed.org); [www.ebi.ac.uk](http://www.ebi.ac.uk), [www.proteinatlas.org](http://www.proteinatlas.org), and [www.uniprot.org](http://www.uniprot.org)

**Supplemental Table S3: The abundantly expressed (Top 10) LOCs in the bovine spermatozoa.**

| Gene ID             | Gene Name/Description                                                                                                                                                                                                                                                                                                           | TPM  | UGR  |
|---------------------|---------------------------------------------------------------------------------------------------------------------------------------------------------------------------------------------------------------------------------------------------------------------------------------------------------------------------------|------|------|
| <i>LOC100335847</i> | Protamine 1-like                                                                                                                                                                                                                                                                                                                | 7817 | 231  |
| <i>LOC786921</i>    | Deubiquitinating enzyme 3-like                                                                                                                                                                                                                                                                                                  | 6418 | 1610 |
| <i>LOC101906132</i> | --                                                                                                                                                                                                                                                                                                                              | 4391 | 711  |
| <i>LOC404073</i>    | Histone H2B variant PT15                                                                                                                                                                                                                                                                                                        | 4174 | 175  |
| <i>LOC786597</i>    | Chromosome 20 open reading frame 106 homolog                                                                                                                                                                                                                                                                                    | 3887 | 244  |
| <i>LOC100335236</i> | PREDICTED: Bos taurus hypothetical protein<br>LOC100335236 transcript                                                                                                                                                                                                                                                           | 3742 | 2374 |
| <i>LOC786327</i>    | T-cell activation Rho GTPase-activating protein-like                                                                                                                                                                                                                                                                            | 3571 | 207  |
| <i>LOC786899</i>    | T-cell activation Rho GTPase-activating protein-like                                                                                                                                                                                                                                                                            | 3379 | 1253 |
| <i>LOC781191</i>    | Uncharacterized protein, found in RNA derived from captured sperm of mixed chromosome content. The gene mapping by the National Center for Biotechnology Information (NCBI) located DNA for GX1 to the bovine X chromosome (NCBI, U.S. National Library of Medicine, 8600 Rockville Pike, Bethesda, Md. 20894; Gene ID 781191). | 3283 | 27   |
| <i>LOC101905684</i> | --                                                                                                                                                                                                                                                                                                                              | 2495 | 149  |



**Supplemental Table S4: The abundantly expressed (Top 20) non-coding RNAs in the bovine spermatozoa with unique gene reads.**

| Transcript ID   | TPM   | Unique Gene Reads |
|-----------------|-------|-------------------|
| NONBTAT002138.2 | 52526 | 361               |
| NONBTAT029740.1 | 46868 | 3315              |
| NONBTAT026069.2 | 39900 | 2036              |
| NONBTAT026075.2 | 26794 | 2320              |
| NONBTAT015718.2 | 14800 | 259               |
| NONBTAT015717.2 | 13829 | 206               |
| NONBTAT017665.2 | 13513 | 205               |
| NONBTAT027794.1 | 7933  | 2971              |
| NONBTAT007060.2 | 7921  | 29                |
| NONBTAT029554.1 | 7846  | 6267              |
| NONBTAT008960.2 | 7804  | 6206              |
| NONBTAT022624.2 | 6306  | 3723              |
| NONBTAT030080.1 | 6070  | 1454              |
| NONBTAT030770.1 | 5672  | 8489              |
| NONBTAT030342.1 | 4966  | 5823              |
| NONBTAT030589.1 | 4619  | 249               |
| NONBTAT031209.1 | 4369  | 4505              |
| NONBTAT022014.2 | 4324  | 6851              |
| NONBTAT025041.2 | 4239  | 205               |
| NONBTAT001981.2 | 4089  | 557               |

**Supplemental Table S5: The pathways associated with spermatozoal RNAs. The analysis was carried out using transcripts with more than 100 TPM with *Bos taurus* as background using DAVID bioinformatics software.**

| KEEG Pathway                     | P-value  | Genes Count | Observed Genes ID                                                                                                                                                    |
|----------------------------------|----------|-------------|----------------------------------------------------------------------------------------------------------------------------------------------------------------------|
| Ribosome                         | 4.96E-09 | 23          | <i>RPL27A, RPL27, RPL37, RPS2, RPS5, RPL28, RPS3, RPS18, RPS27, RPL32, RPL23, RPL18A, RPS29, RPL31, RPL6, RPL13A, RPLP0, RPS14, FAU, RPL10A, RPS11, UBA52, RPS23</i> |
| Axon guidance                    | 0.01     | 12          | <i>PAK6, MAPK1, EPHA7, EPHB6, PLXNA4, CXCR4, SEMA4F, SEMA3E, CFL1, SEMA3D, UNC5D, ARHGEF12</i>                                                                       |
| Salmonella infection             | 0.01     | 9           | <i>ACTB, FOS, PFN1, MAPK1, CCL3, IL18, IL1B, TLR5, FLNB</i>                                                                                                          |
| Viral myocarditis                | 0.01     | 8           | <i>ACTB, EIF4G2, PRF1, EIF4G3, BOLA-DOA, BLA-DQB, DAG1, SGCD</i>                                                                                                     |
| Inflammatory bowel disease (IBD) | 0.02     | 8           | <i>IL12RB2, STAT4, IL18, BOLA-DOA, BLA-DQB, IL1B, TLR5, STAT1</i>                                                                                                    |
| PPAR signaling pathway           | 0.02     | 8           | <i>SLC27A1, GK2, UBC, FABP3, ACSBG2, RXRG, FABP1, CYP8B1</i>                                                                                                         |
| Galactose metabolism             | 0.03     | 5           | <i>PFKL, AKR1B1, PFKP, G6PC3, G6PC2</i>                                                                                                                              |
| Glutathione metabolism           | 0.05     | 6           | <i>GPX2, GSTM3, SRM, GSTO1, GCLM</i>                                                                                                                                 |
| Oocyte meiosis                   | 0.07     | 9           | <i>PLCZ1, IGF1R, MAPK1, YWHAZ, ADCY8, ANAPC13, SKP1, CDC25C, CALM2</i>                                                                                               |
| RNA degradation                  | 0.07     | 7           | <i>PFKL, BTG1, PFKP, RQCD1, DHX36, LSM2, CNOT6</i>                                                                                                                   |

**Supplemental Table S6: Cluster analysis of commonly expressed genes in all animals detected by Ion Proton and Illumina platforms. These genes considered for this analysis were not differentially expressed between platforms.**

| Category                    | Term                                                 | Genes Count | P-value |
|-----------------------------|------------------------------------------------------|-------------|---------|
| <b>Annotation Cluster 1</b> | <b>Enrichment Score: 2.60</b>                        |             |         |
| UP_KEYWORDS                 | ATP-binding                                          | 37          | 0.00    |
| GOTERM_MF_DIRECT            | GO:0005524~ATP binding                               | 22          | 0.00    |
| UP_KEYWORDS                 | Nucleotide-binding                                   | 43          | 0.01    |
| <b>Annotation Cluster 2</b> | <b>Enrichment Score: 1.60</b>                        |             |         |
| INTERPRO                    | IPR019844:Cold-shock conserved site                  | 3           | 0.01    |
| INTERPRO                    | IPR002059:Cold-shock protein, DNA-binding            | 3           | 0.02    |
| INTERPRO                    | IPR011129:Cold shock protein                         | 3           | 0.02    |
| SMART                       | SM00357:SM00357                                      | 3           | 0.02    |
| INTERPRO                    | IPR012340:Nucleic acid-binding, OB-fold              | 5           | 0.11    |
| <b>Annotation Cluster 3</b> | <b>Enrichment Score: 1.58</b>                        |             |         |
| UP_KEYWORDS                 | Zinc-finger                                          | 31          | 0.01    |
| UP_KEYWORDS                 | Metal-binding                                        | 60          | 0.03    |
| UP_KEYWORDS                 | Zinc                                                 | 38          | 0.05    |
| <b>Annotation Cluster 4</b> | <b>Enrichment Score: 1.46</b>                        |             |         |
| UP_KEYWORDS                 | TPR repeat                                           | 8           | 0.00    |
| INTERPRO                    | IPR011990:Tetratricopeptide-like helical             | 11          | 0.01    |
| UP_SEQ_FEATURE              | repeat:TPR 2                                         | 4           | 0.07    |
| UP_SEQ_FEATURE              | repeat:TPR 1                                         | 4           | 0.07    |
| UP_SEQ_FEATURE              | repeat:TPR 3                                         | 3           | 0.19    |
| <b>Annotation Cluster 5</b> | <b>Enrichment Score: 1.46</b>                        |             |         |
| UP_KEYWORDS                 | TPR repeat                                           | 8           | 0.00    |
| INTERPRO                    | IPR011990:Tetratricopeptide-like helical             | 11          | 0.01    |
| INTERPRO                    | IPR013026:Tetratricopeptide repeat-containing domain | 8           | 0.02    |
| INTERPRO                    | IPR019734:Tetratricopeptide repeat                   | 7           | 0.05    |
| INTERPRO                    | IPR013105:Tetratricopeptide TPR2                     | 3           | 0.20    |
| SMART                       | SM00028:SM00028                                      | 5           | 0.20    |
| <b>Annotation Cluster 6</b> | <b>Enrichment Score: 1.37</b>                        |             |         |
| UP_KEYWORDS                 | Microtubule                                          | 11          | 0.00    |
| GOTERM_BP_DIRECT            | GO:0007017~microtubule-based process                 | 3           | 0.06    |

|                              |                                                      |    |      |
|------------------------------|------------------------------------------------------|----|------|
| GOTERM_CC_DIRECT             | GO:0005874~microtubule                               | 6  | 0.08 |
| GOTERM_BP_DIRECT             | GO:0008152~metabolic process                         | 8  | 0.26 |
| <b>Annotation Cluster 7</b>  | <b>Enrichment Score: 1.36</b>                        |    |      |
| KEGG_PATHWAY                 | bta03040:Spliceosome                                 | 12 | 0.00 |
| INTERPRO                     | IPR013126:Heat shock protein 70 family               | 4  | 0.01 |
| INTERPRO                     | IPR018181:Heat shock protein 70, conserved site      | 4  | 0.01 |
| KEGG_PATHWAY                 | bta04915:Estrogen signaling pathway                  | 9  | 0.01 |
| KEGG_PATHWAY                 | bta05169:Epstein-Barr virus infection                | 13 | 0.01 |
| KEGG_PATHWAY                 | bta05134:Legionellosis                               | 6  | 0.03 |
| KEGG_PATHWAY                 | bta04141:Protein processing in endoplasmic reticulum | 10 | 0.06 |
| UP_KEYWORDS                  | Stress response                                      | 5  | 0.07 |
| KEGG_PATHWAY                 | bta04010:MAPK signaling pathway                      | 13 | 0.09 |
| KEGG_PATHWAY                 | bta05145:Toxoplasmosis                               | 7  | 0.16 |
| KEGG_PATHWAY                 | bta04612:Antigen processing and presentation         | 5  | 0.19 |
| KEGG_PATHWAY                 | bta05164:Influenza A                                 | 8  | 0.27 |
| UP_KEYWORDS                  | Chaperone                                            | 6  | 0.28 |
| KEGG_PATHWAY                 | bta05162:Measles                                     | 6  | 0.41 |
| <b>Annotation Cluster 8</b>  | <b>Enrichment Score: 1.07</b>                        |    |      |
| KEGG_PATHWAY                 | bta05231:Choline metabolism in cancer                | 8  | 0.03 |
| KEGG_PATHWAY                 | bta04666:Fc gamma R-mediated phagocytosis            | 7  | 0.04 |
| KEGG_PATHWAY                 | bta05132:Salmonella infection                        | 4  | 0.46 |
| <b>Annotation Cluster 9</b>  | <b>Enrichment Score: 0.97</b>                        |    |      |
| INTERPRO                     | IPR019821:Kinesin, motor region, conserved site      | 3  | 0.09 |
| INTERPRO                     | IPR001752:Kinesin, motor domain                      | 3  | 0.10 |
| UP_KEYWORDS                  | Motor protein                                        | 5  | 0.10 |
| SMART                        | SM00129:SM00129                                      | 3  | 0.13 |
| <b>Annotation Cluster 10</b> | <b>Enrichment Score: 0.96</b>                        |    |      |
| GOTERM_MF_DIRECT             | GO:0005516~calmodulin binding                        | 5  | 0.05 |
| UP_KEYWORDS                  | Calmodulin-binding                                   | 5  | 0.05 |
| KEGG_PATHWAY                 | bta04020:Calcium signaling pathway                   | 7  | 0.49 |

**Supplemental Table S7: The primers used for assessing the contamination of epithelial cells, germ cells and leukocytes RNA and also spermatozoal gDNA in isolated spermatozoal total RNA.**

| Primer ID      | Primer Sequence (5' – 3') | Primer length (bp) | Product size (bp) | Intron Span (Yes/No) | Accession Number | Purpose          |
|----------------|---------------------------|--------------------|-------------------|----------------------|------------------|------------------|
| <i>CDHI-F</i>  | CTGCATTCCTGGCTTTGGTG      | 20                 | 171               | Yes                  | NM_001002763.1   | Epithelial cell  |
| <i>CDHI-R</i>  | GTAAGCACGCCATCTGTGTG      | 20                 |                   |                      |                  |                  |
| <i>KIT-F</i>   | GAATAGCTGGCATCAGGGTG      | 20                 | 224               | Yes                  | AF263827.1       | Germ cell        |
| <i>KIT-R</i>   | CCAGATCCACATTCTCTCCATC    | 22                 |                   |                      |                  |                  |
| <i>PTPRC-F</i> | ACCCAACCTTCTACTCAAGATG    | 22                 | 124               | Yes                  | NM_001206523.1   | Leukocytes       |
| <i>PTPRC-R</i> | CGTATTTGTTCTCACATGGTGG    | 22                 |                   |                      |                  |                  |
| <i>PRM1-F</i>  | AAGATGTTCGCAGACGAAGGAG    | 21                 | 222               | Yes                  | NM_174156.2      | Sperm RNA & gDNA |
| <i>PRM1-R</i>  | GTGGCATTGTTTCGTTAGCAGG    | 21                 |                   |                      |                  |                  |
| <i>PRM1-F*</i> | ATGGCCAGATACCGATGC        | 18                 | 156               | Yes                  | NM_174156.2      | Coding region    |
| <i>PRM1-R*</i> | TTACTGTCTTGTACACCT        | 18                 |                   |                      |                  |                  |

\* The protamine1 (PRM1) primer covering coding region was used for confirmation of presence of spermatozoal RNA.

**Supplemental Table S8: The primers used for validating transcripts presence in spermatozoa. The transcripts were selected based on the expression levels (TPM) and read coverage.**

| Primer ID           | Primer sequence (5' – 3') | Primer length (bp) | Product size (bp) | Intron Span Yes/No | Accession Number |
|---------------------|---------------------------|--------------------|-------------------|--------------------|------------------|
| <i>HMGB4-F</i>      | AGACGGATGTGGACAAGCAG      | 20                 | 150               | No                 | NM_001040562.3   |
| <i>HMGB4-R</i>      | GCTCGAACTCTCTGCACTGG      | 20                 |                   |                    |                  |
| <i>CHMP5-F</i>      | TGACCTCGAAGCAGAGTTGG      | 20                 | 120               | Yes/E-E            | NM_001034682.2   |
| <i>CHMP5-R</i>      | TTCGTGTCAGTGGGAACACC      | 20                 |                   |                    |                  |
| <i>YWHAZ-F</i>      | GGAAATGCAACCAACACATCC     | 21                 | 126               | Yes/E-E            | NM_174814.2      |
| <i>YWHAZ-R</i>      | ATGGCTTCATCAAATGCTGTC     | 21                 |                   |                    |                  |
| <i>SCP2D1-F</i>     | AGTGCAGTGGGATGTGGAAG      | 20                 | 133               | No                 | NM_001040507.2   |
| <i>SCP2D1-R</i>     | TCTGACAGCGAGAGAGGGTG      | 20                 |                   |                    |                  |
| <i>GTSF1L-F</i>     | GGCATCTGCTTTGTGTGGTC      | 20                 | 137               | No                 | NM_001079601.2   |
| <i>GTSF1L-R</i>     | ACAACCTCGGGCTGCCTATTC     | 20                 |                   |                    |                  |
| <i>C23H6orf62-F</i> | AGACAGCACTTGCAGACTCC      | 20                 | 134               | Yes/E-E            | NM_001077999.2   |
| <i>C23H6orf62-R</i> | GGCATGTAGGGATGGAGGTG      | 20                 |                   |                    |                  |
| <i>SDCBP2-F</i>     | TCCAGAAAGTGCCAGTGCAG      | 20                 | 126               | No                 | XM_003586805.2   |
| <i>SDCBP2-R</i>     | CATAGGTGGATCTCGCGCAC      | 20                 |                   |                    |                  |
| <i>HSFY2-F</i>      | AAGCAAGTGTCAACGAAGATG     | 21                 | 128               | No                 | NM_001077006.1   |
| <i>HSFY2-R</i>      | GACAATCTGGATGGTATGAGGC    | 22                 |                   |                    |                  |
| <i>OR6C2-F</i>      | GCTGCTTGTGCCAGTCAAC       | 19                 | 149               | No                 | XM_001254810.2   |
| <i>OR6C2-R</i>      | ACGTTCTTGCAGACTCTAATGC    | 22                 |                   |                    |                  |
| <i>MGC157405-F</i>  | TACACATGGACCGCATCTCC      | 20                 | 135               | Yes/E-E            | NM_001083697.2   |
| <i>MGC157405-R</i>  | CGCCGATGAGCTTCTGTATG      | 20                 |                   |                    |                  |
| <i>ZNF280B-F</i>    | GGGACCGGATGTGACCTTC       | 19                 | 103               | Yes/E-E            | NM_001077935.1   |
| <i>ZNF280B-R</i>    | CCACAAGTCCCAGTGCTTCC      | 20                 |                   |                    |                  |
| <i>PLCZ1-F</i>      | TGCATGAACAGAGGTTACCG      | 20                 | 118               | No                 | NM_001011680.2   |
| <i>PLCZ1-R</i>      | TGTCAAGTACCATGAGTGGC      | 20                 |                   |                    |                  |

**Supplemental Figure 1: The work flow of spermatozoal RNA sequencing procedure and the softwares used for analyzing the transcriptome data.**

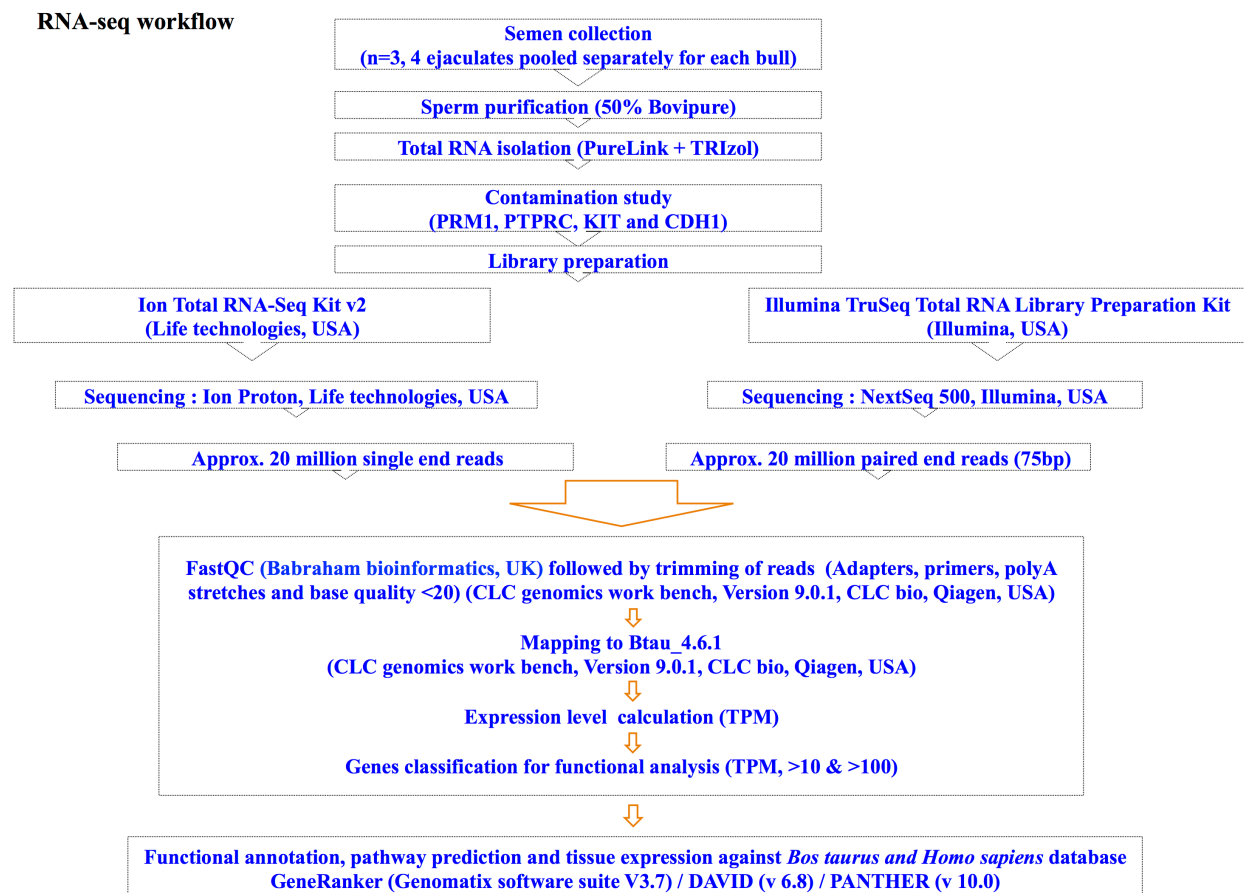

**Supplemental Figure 2: The involvement of abundant (>100 TPM) spermatozoal transcripts in axon guidance (a) and oocyte meiosis (b) based on KEGG pathway (<http://www.kegg.jp/kegg/kegg2.html>). The genes observed in the present study were highlighted in red colour.**

**a) Axon guidance**

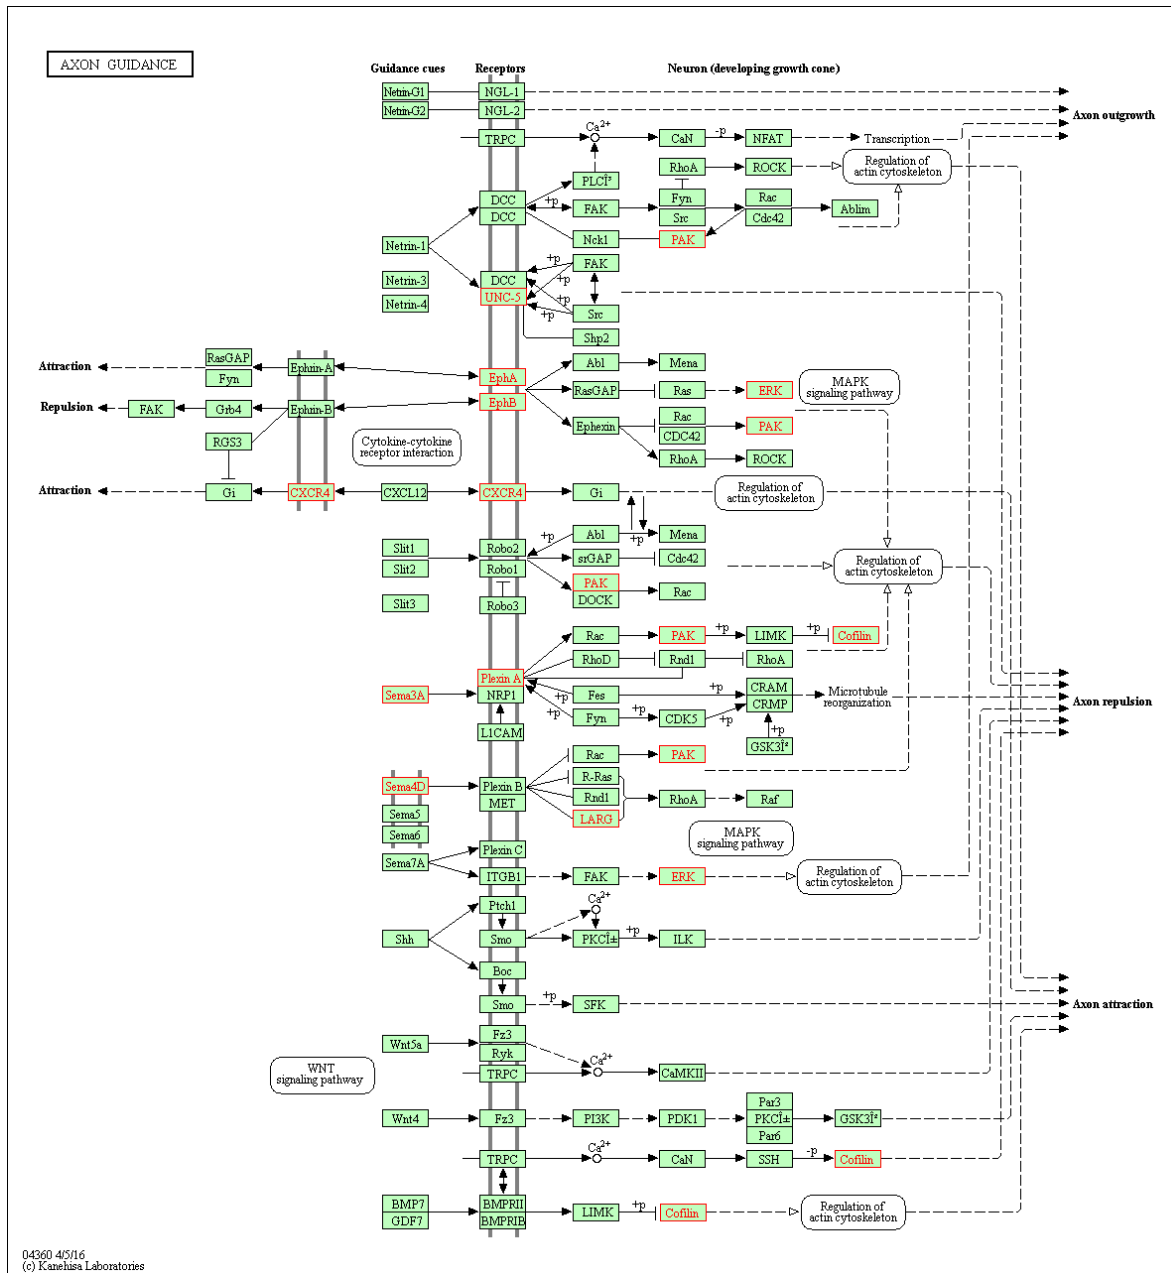





**Supplemental Figure 3: The common number of genes (top 328 transcripts) observed in this current study from fresh bull spermatozoa were compared with the earlier study in cryopreserved sperm<sup>6</sup>.**

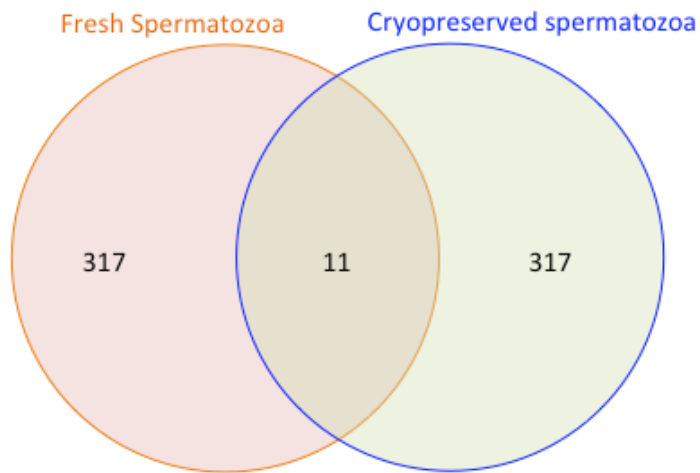

## References

1. Dogan, S. *et al.* Sperm protamine-status correlates to the fertility of breeding bulls. *Biol. Reprod.* **92**, 1-9 (2015).
2. Shim, J. H. *et al.* CHMP5 is essential for late endosome function and down-regulation of receptor signaling during mouse embryogenesis. *J. Cell Biol.* **172**,1045-1056 (2006).
3. Puri, P., Myers, K., Kline, D. & Vijayaraghavan, S. Proteomic analysis of bovine sperm YWHA binding partners identify proteins involved in signaling and metabolism. *Biol. Reprod.* **79**, 1183-1191(2008).
4. Yoshimura, T. *et al.* Gtsf1/Cue110, a gene encoding a protein with two copies of a CHHC Zn-finger motif, is involved in spermatogenesis and retrotransposon suppression in murine testes. *Develop. Biol.* **335**, 216-227 (2009).
5. Ing, N. H. *et al.* Sequencing of RNA from stallion sperm identifies potential markers of fertility. *J. Equine Vet. Sci.* **43**, S64 (2016).
6. Card, C. J. *et al.* Cryopreserved bovine spermatozoal transcript profile as revealed by high-throughput ribonucleic acid sequencing. *Biol. Reprod.* **88**, 49 (2013).
7. Schwarz, T., Prieler, B., Schmid, J. & Neesen, J. Molecular characterization of Ccdc181, a Hook1 and microtubule interacting protein. 11th YSA PhD Symposium, Abstract Book. Abstract no. 112. 72-73 (2015).
8. Liu, R. Z., Li, X. & Godbout, R. A novel fatty acid-binding protein (FABP) gene resulting from tandem gene duplication in mammals: transcription in rat retina and testis. *Genomics*, **92**, 436-445 (2008).

9. Nishimura, M., Naito, S. & Yokoi, T. Tissue-specific mRNA expression profiles of human nuclear receptor subfamilies. *Drug Metab. Pharmacokinet.* **19**, 135-149 (2004).
10. Lee, J., Lee, D. R. & Lee, S. The genetic variation in Monocarboxylic acid transporter 2 (MCT2) has functional and clinical relevance with male infertility. *Asian J. Androl.* **16**, 694 (2014).
11. Zhang, J. S., *et al.* Genome-wide profiling of segmental-regulated transcriptomes in human epididymis using oligo microarray. *Mol. Cell. Endocrinol.* **250**, 169-177 (2006).
12. Zuccarello, D. *et al.* How the human spermatozoa sense the oocyte: a new role of SDF1-CXCR4 signalling. *Int. J. Androl.* **34**, e554-e565 (2011).
13. Ushizawa, K. *et al.* Global gene expression analysis and regulation of the principal genes expressed in bovine placenta in relation to the transcription factor AP-2 family. *Reprod. Biol. Endocrinol.* **5**, 17 (2007).
14. Ferrer, M. *et al.* MMP2 and acrosin are major proteinases associated with the inner acrosomal membrane and may cooperate in sperm penetration of the zona pellucida during fertilization. *Cell Tissue Res.* **349**, 881-895 (2012).
15. Behmanesh, M. *et al.* Characterization of the structure and expression of mouse Itpa gene and its related sequences in the mouse genome. *DNA Res.* **12**, 39-51(2005).
16. Wenhao, T. *et al.* miRNA-mediated regulation of heat shock proteins in human ejaculated spermatozoa. *Turkish J. Med. Sci.* **45**, 1285-1291(2015).
